# Supplementary material
Source: PubMed Central journal article supplement (PMC6286867)
Supplement: NIHMS974908-supplement.pdf [file NIHMS974908-supplement.pdf]

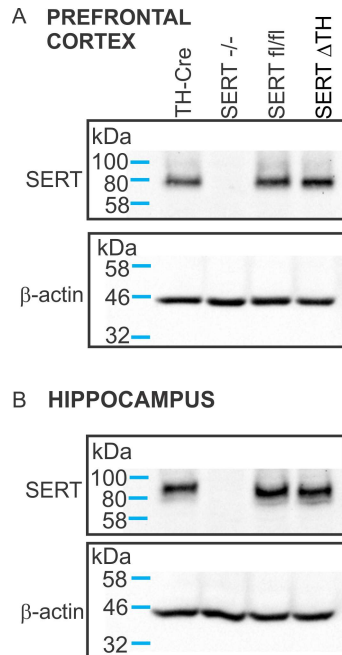

**Supplementary Figure S1: SERT protein expression remained intact in the prefrontal cortex and hippocampus of SERT<sup>ΔTH</sup> mice.** Representative western blots of SERT and β-actin (sample loading control) protein expression in prefrontal cortex **(A)** and hippocampus **(B)** tissue samples. SERT was expressed in SERT<sup>ΔTH</sup> conditional knockout samples as well as floxed (SERT<sup>fl/fl</sup>) littermate controls and the Th-IRES-Cre (TH-Cre) parent line. SERT was not expressed in the SERT<sup>-/-</sup> constitutive (global) SERT knockout line (negative control).

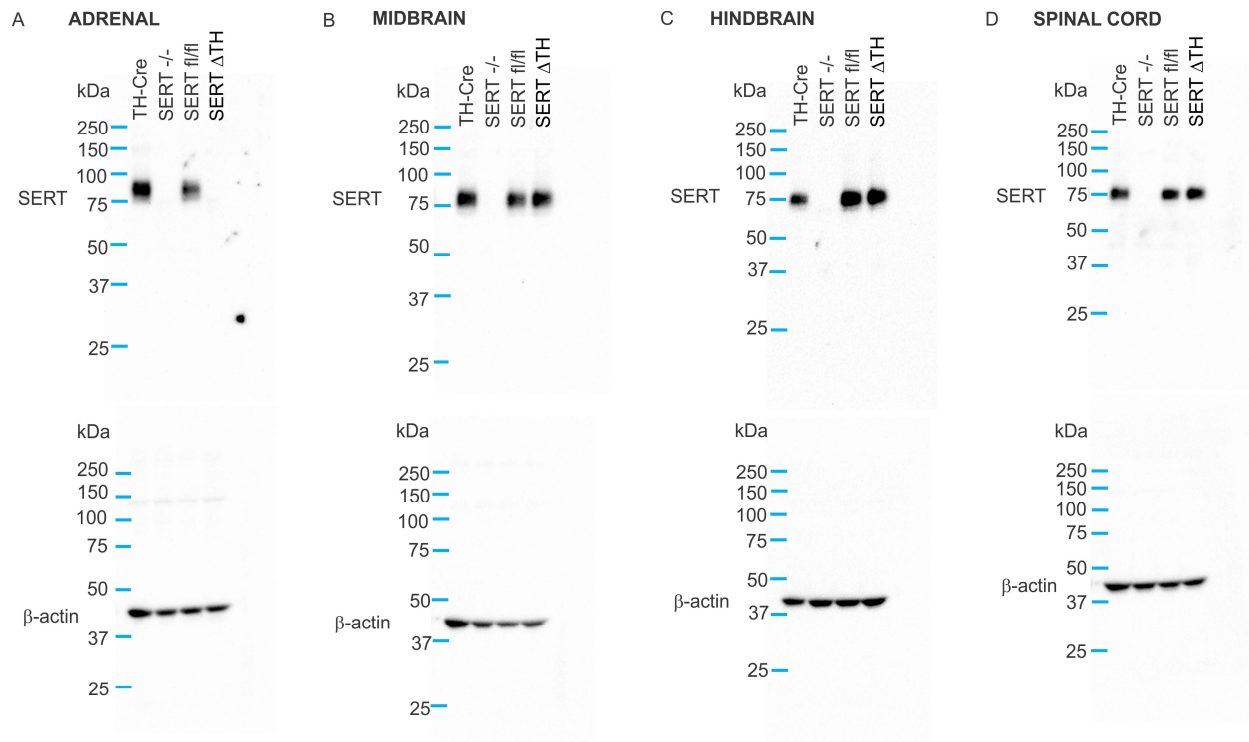

**Supplementary Figure S2: Original un-cropped images of representative western blot data shown in Figure 2.** Un-cropped original western blots for SERT (top panel) and  $\beta$ -actin (bottom panel) protein expression in **A)** adrenal gland, **B)** midbrain, **C)** hindbrain, and **D)** spinal cord tissue samples. TH-Cre is the parent Th-IRES-Cre driver line (positive control); SERT<sup>-/-</sup> is the constitutive (global) SERT knockout line (negative control); SERT <sup>$\Delta$ TH</sup> and SERT<sup>fl/fl</sup> are the conditional knockout and floxed control littermates respectively.
